# Supplementary material
Source: Springer Nature journal article supplement (https://www.springermedizin.de/resource/supplementary/13054_2012_941_MOESM6_ESM.pdf/9709290)

Principal component analysis of derivation cohort

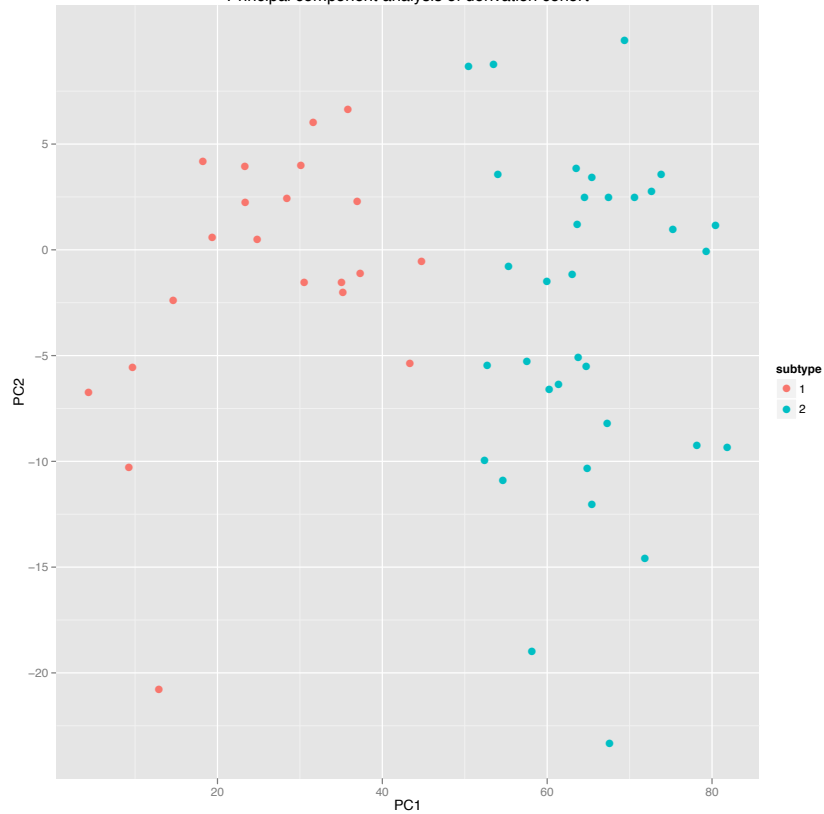

Distribution of values for first principal component, according to sepsis subtype

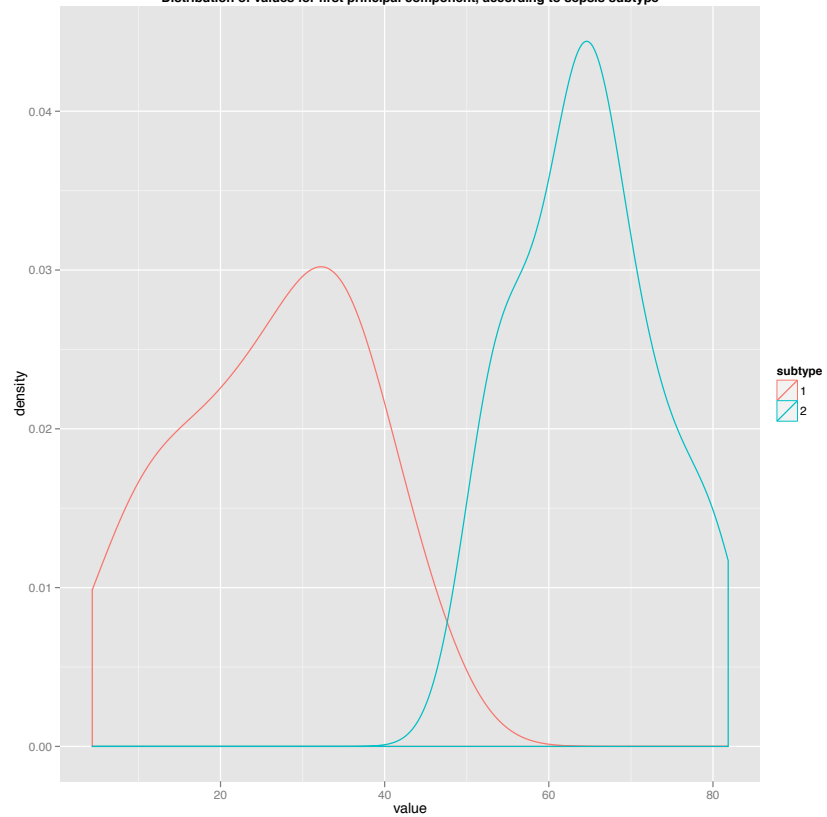

Supplement: MOESM6 [file 9709290]
